# Supplementary material for: Efficacy of Multifocal Soft Contact Lenses in Reducing Myopia Progression Among Taiwanese Schoolchildren: A Randomized Paired-Eye Clinical Trial
Source: Springer Nature journal article supplement (doi:10.1007/s40123-023-00859-x), 2023-12-21
Supplement: MOESM1 [file 26555710]

**Efficacy of Multifocal Soft Contact Lenses in Reducing Myopia Progression Among Taiwanese Schoolchildren: A Randomized Paired-Eye Clinical Trial**

Yao-Lin Liu, MD<sup>1,2</sup>, Ken-Kuo Lin, MD<sup>3</sup>, Li-Sheng Cheng, MD<sup>4,5</sup>, Chao-Wen Lin, MD<sup>1</sup>,  
Jiahn-Shing Lee, MD<sup>6</sup>, Chiun-Ho Hou, MD<sup>1</sup>, Tzu-Hsun Tsai, MD, PhD<sup>1,7</sup>

<sup>1</sup>Department of Ophthalmology, National Taiwan University Hospital, College of Medicine, National Taiwan University, Taipei, Taiwan

<sup>2</sup>Institute of Epidemiology and Preventive Medicine, College of Public Health, National Taiwan University, Taipei, Taiwan

<sup>3</sup>Department of Ophthalmology, Chang Gung Memorial Hospital Linkou branches

<sup>4</sup>Great Vision Eye Clinic, Taichung, Taiwan

<sup>5</sup>College of Biological Science and Technology, National Yang Ming Chiao Tung University, Hsinchu, Taiwan

<sup>6</sup>Department of Ophthalmology, Chang Gung Memorial Hospital Taipei branches

<sup>7</sup>Department of Ophthalmology, National Taiwan University Hospital Hsin-Chu Branch, College of Medicine, National Taiwan University, Hsinchu County, Taiwan

Corresponding Author:

Tzu-Hsun Tsai, MD, PhD

ORCID ID: <https://orcid.org/0000-0002-2320-4458>

Department of Ophthalmology, National Taiwan University Hospital Hsin-Chu Branch

No. 2, Sec. 1, Shengyi Rd., Zhubei City, Hsinchu County 302, Taiwan (R.O.C.)

Tel: 886-2-23123456, ext: 265906

Fax: 886-2-23934420

E-mail address: [lucia\\_tsai@yahoo.com.tw](mailto:lucia_tsai@yahoo.com.tw); [tsaith@ntuh.gov.tw](mailto:tsaith@ntuh.gov.tw)

### Supplement Figure 1

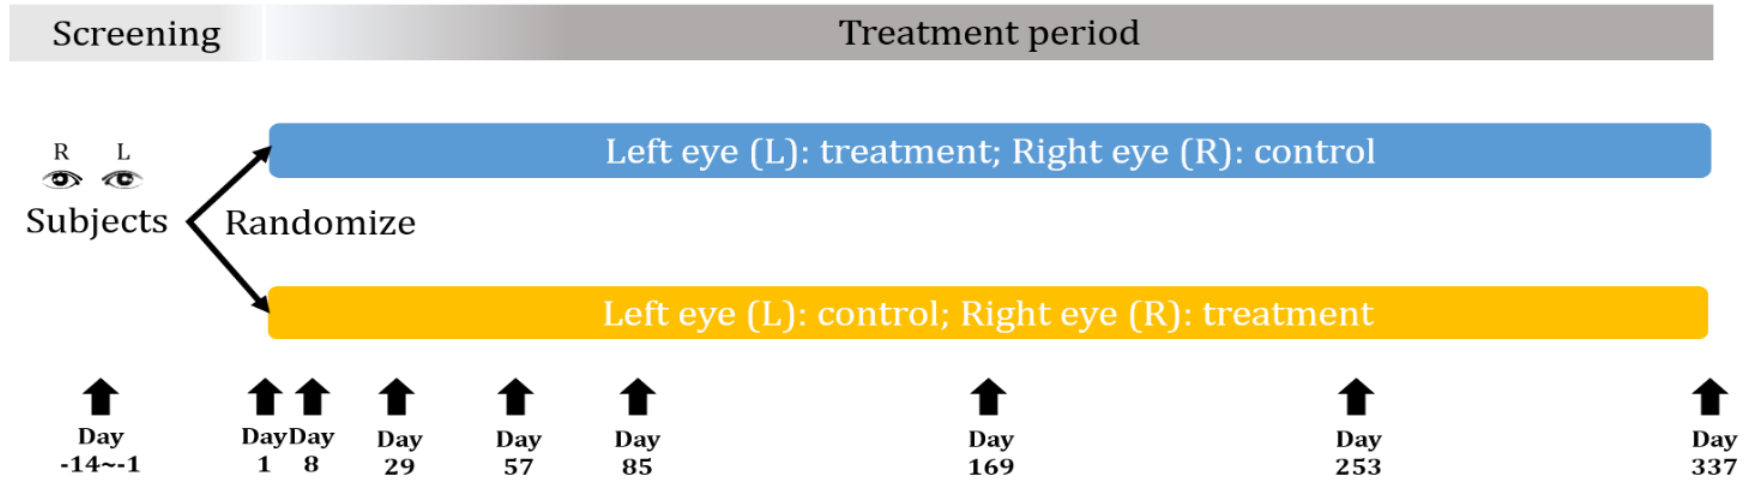

**Supplement Table 1.**

The devices used for measuring refraction and axial length at the 3 study sites were listed as below:

| Autorefractor   | Axial length measurement |
|-----------------|--------------------------|
| TOPCON KR-880   | NIDEK AL-SCAN            |
| TOPCON KR-8100P | IOL Master               |
| TOPCON KR-8800  | Lenstar LS900            |
| NIDEK ARK-510A  |                          |

**Supplement Table 2.**

The outcomes of participants' self-assessment regarding visual symptoms.

| Self-assessment items, N (%) | Test Lens (N=52) | Control Lens (N=52) | P-value <sup>#</sup> |
|------------------------------|------------------|---------------------|----------------------|
| Comfortable                  | 15 (28.8%)       | 11 (21.2%)          |                      |
| Average                      | 2 (3.8%)         | 2 (3.8%)            |                      |
| <b>Symptoms</b>              |                  |                     |                      |
| <b>Dry sensation</b>         |                  |                     |                      |
| Number                       | 52               | 52                  | >0.999               |
| Normal                       | 46 (88.5%)       | 45 (86.5%)          |                      |
| Mild                         | 6 (11.5%)        | 7 (13.5%)           |                      |
| <b>Burning</b>               |                  |                     |                      |
| Number                       | 52               | 52                  | >0.999               |
| Normal                       | 51 (98.1%)       | 51 (98.1%)          |                      |
| Mild                         | 1 (1.9%)         | 1 (1.9%)            |                      |
| <b>Itching</b>               |                  |                     |                      |
| Number                       | 52               | 52                  | >0.999               |
| Normal                       | 45 (86.5%)       | 46 (88.5%)          |                      |
| Mild                         | 7 (13.5%)        | 6 (11.5%)           |                      |
| <b>Pain</b>                  |                  |                     |                      |
| Number                       | 52               | 52                  | >0.999               |
| Normal                       | 51 (98.1%)       | 50 (96.2%)          |                      |
| Mild                         | 1 (1.9%)         | 2 (3.8%)            |                      |
| <b>Photophobia</b>           |                  |                     |                      |
| Number                       | 52               | 52                  | NA                   |
| Normal                       | 52 (100.0%)      | 52 (100.0%)         |                      |
| <b>Lens awareness</b>        |                  |                     |                      |
| Number                       | 52               | 52                  | >0.999               |
| Normal                       | 51 (98.1%)       | 51 (98.1%)          |                      |
| Mild                         | 1 (1.9%)         | 1 (1.9%)            |                      |
| <b>Epiphora</b>              |                  |                     |                      |
| Number                       | 52               | 52                  | 0.715                |
| Normal                       | 49 (94.2%)       | 47 (90.4%)          |                      |
| Mild                         | 3 (5.8%)         | 5 (9.6%)            |                      |
| <b>Asthenopia</b>            |                  |                     |                      |
| Number                       | 52               | 52                  | >0.999               |
| Normal                       | 51 (98.1%)       | 51 (98.1%)          |                      |
| Mild                         | 1 (1.9%)         | 1 (1.9%)            |                      |

|                              |             |             |        |
|------------------------------|-------------|-------------|--------|
| <b>Vision unstable</b>       |             |             |        |
| Number                       | 52          | 52          | >0.999 |
| Normal                       | 50 (96.2%)  | 50 (96.2%)  |        |
| Mild                         | 1 (1.9%)    | 2 (3.8%)    |        |
| Severe (daily life affected) | 1 (1.9%)    | 0 (0.0%)    |        |
| <b>Halo</b>                  |             |             |        |
| Number                       | 52          | 52          | NA     |
| Normal                       | 52 (100.0%) | 52 (100.0%) |        |
| <b>Glare</b>                 |             |             |        |
| Number                       | 52          | 52          | NA     |
| Normal                       | 52 (100.0%) | 52 (100.0%) |        |
| <b>Reading problem</b>       |             |             |        |
| Number                       | 52          | 52          | NA     |
| Normal                       | 52 (100.0%) | 52 (100.0%) |        |
| <b>Poor handling</b>         |             |             |        |
| Number                       | 52          | 52          | >0.999 |
| Normal                       | 49 (94.2%)  | 50 (96.2%)  |        |
| Mild                         | 3 (5.8%)    | 2 (3.8%)    |        |
